# Supplementary material for: Assessing Recharge Sources and Seawater Intrusion in Coastal Groundwater: A Hydrogeological and Multi-Isotopic Approach
Source: MDPI journal article supplement (doi:10.3390/w16081106), 2024-04-12
Supplement: s1 [file s1]

Table S1. Chemical results. ID: d dynamic sampling; s static sampling. Type: usd, urban sewage treatment plant discharge; gw, groundwater; sw, surface water. Group: 1, salty water; 2, brackish water; 3, fresh water. DWT: Depth to water table.

| ID  | Type | Group | Data    | DWT  | T     | pH   | EC    | O <sub>2</sub> | Ca  | Mg   | Na   | K   | Cl-   | HCO <sub>3</sub> | SO <sub>4</sub> | NO <sub>3</sub> | NH <sub>4</sub> | B    | Br   | SiO <sub>2</sub> | Sr   | Li   | Rb    |
|-----|------|-------|---------|------|-------|------|-------|----------------|-----|------|------|-----|-------|------------------|-----------------|-----------------|-----------------|------|------|------------------|------|------|-------|
|     |      |       |         | m    | (°C)  |      | mS/cm |                |     |      |      |     |       | mg/l             |                 |                 |                 |      |      |                  |      | µg/L | µg/L  |
| 1   | usd  | 3     | oct-20  | 0.42 | 21.40 | 6.96 | 0.74  | 7.07           | 51  | 19   | 72   | 16  | 123   | 132              | 59              | 32              | <0.1            | 0.06 | 0.20 | 12               | 1.4  | 7    | 10    |
| 2   | gw   | 3     | oct-20  | 3.4  | 18.31 | 6.79 | 0.37  | 4.25           | 36  | 11   | 28   | 2.6 | 52    | 99               | 33              | 6.6             | <0.1            | 0.04 | 0.25 | 13               | 0.15 | 5.4  | 0.38  |
| 3   | gw   | 3     | oct-20  | 3.3  | 18.60 | 6.63 | 0.42  | 4.57           | 42  | 15   | 32   | 3.7 | 60    | 140              | 38              | 6.3             | <0.1            | 0.04 | 0.26 | 12               | 0.17 | 4.7  | 0.49  |
| 4   | gw   | 3     | oct-20  | 2.6  | 19.40 | 6.60 | 0.61  | 1.73           | 60  | 20   | 51   | 2.1 | 95    | 175              | 68              | 0.62            | <0.1            | 0.05 | 0.45 | 15               | 0.19 | 6.6  | 0.71  |
| 4   | gw   | 3     | jun-22  | 2.9  | 17.40 | 6.89 | 0.63  | 1.78           | 54  | 20   | 49   | 2.4 | 86    | 165              | 61              | 0.33            | <0.1            | 0.05 | 0.26 | 16               | 0.18 | 6.7  | 1.1   |
| 6   | gw   | 3     | sept-20 | 1.7  | 19.65 | 7.45 | 1.02  | 8.29           | 63  | 32   | 108  | 4.3 | 225   | 170              | 76              | 1.1             | <0.1            | 0.06 | 0.85 | 13               | 0.24 | 7.7  | 0.95  |
| 7d  | gw   | 1     | jun-22  | -    | 18.30 | 6.75 | 23.65 | 1.97           | 545 | 733  | 4770 | 84  | 9680  | 115              | 1140            | <0.2            | 1.65            | 0.41 | 30   | 11               | 3.7  | 61   | 15    |
| 7s  | gw   | 2     | sept-20 | 1.6  | 21.80 | 7.20 | 2.55  | 3.20           | 97  | 61   | 412  | 13  | 795   | 195              | 111             | 2.1             | <0.1            | 0.07 | 3.4  | 13               | 0.38 | 14   | 4.0   |
| 7s  | gw   | 2     | jun-22  | 1.5  | 18.60 | 6.87 | 1.92  | 2.33           | 51  | 44   | 255  | 12  | 523   | 91               | 74              | 0.30            | 0.21            | 0.05 | 1.6  | 7.9              | 0.25 | 5.3  | 2.2   |
| 8d  | gw   | 2     | jun-22  | -    | 18.40 | 7.59 | 5.04  | 0.68           | 57  | 126  | 1060 | 44  | 1730  | 688              | 89              | <0.2            | 22.30           | 1.5  | 5.2  | 25               | 0.79 | 22   | 11    |
| 8s  | gw   | 2     | sept-20 | 1.2  | 21.00 | 7.90 | 2.24  | 1.40           | 26  | 39   | 440  | 48  | 546   | 627              | 4               | 2.2             | 11.50           | 1.2  | 2.5  | 24               | 0.35 | 13   | 7.1   |
| 8s  | gw   | 2     | jun-22  | 1.2  | 18.80 | 7.61 | 2.28  | 1.22           | 27  | 42   | 430  | 29  | 527   | 600              | 3               | <0.2            | 13.70           | 1.2  | 1.8  | 26               | 0.32 | 11   | 5.2   |
| 9d  | gw   | 1     | jun-22  | -    | 19.60 | 7.04 | 13.40 | 2.74           | 352 | 390  | 2330 | 66  | 4960  | 221              | 454             | <0.2            | 9.54            | 0.68 | 15   | 12               | 3.6  | 55   | 11    |
| 9s  | gw   | 1     | sept-20 | 0.5  | 22.25 | 7.30 | 11.92 | 2.80           | 314 | 340  | 2068 | 59  | 4650  | 213              | 434             | 0.10            | <0.1            | 0.81 | 16   | 5.3              | 1.2  | 56   | 11    |
| 9s  | gw   | 1     | jun-22  | 0.7  | 19.90 | 6.90 | 13.53 | 1.42           | 353 | 389  | 2390 | 69  | 5100  | 221              | 465             | 0.50            | 17.01           | 0.68 | 17   | 12               | 3.6  | 56   | 11    |
| 10  | gw   | 3     | sept-20 | 3.9  | 20.90 | 7.44 | 0.26  | 3.80           | 14  | 8    | 26   | 2.1 | 44    | 50               | 18              | 5.5             | <0.1            | 0.02 | 0.21 | 14               | 0.10 | 2.2  | <0.01 |
| 11  | gw   | 3     | sept-20 | 4.4  | 21.20 | 7.31 | 0.81  | 4.19           | 68  | 28   | 71   | 2.9 | 114   | 227              | 87              | 8.3             | <0.1            | 0.09 | 0.43 | 16               | 0.22 | 7.9  | 0.33  |
| 12  | gw   | 3     | sept-20 | 3.8  | 18.40 | 7.00 | 0.66  | 4.40           | 53  | 24   | 58   | 2.5 | 120   | 177              | 54              | 2.8             | <0.1            | 0.04 | 0.47 | 10               | 0.20 | 7.8  | 1.05  |
| 13  | gw   | 3     | sept-20 | 2.8  | 18.50 | 7.82 | 0.68  | 4.69           | 59  | 26   | 50   | 1.7 | 106   | 194              | 55              | 1.3             | <0.1            | 0.03 | 0.46 | 10               | 0.16 | 6.4  | 0.58  |
| 13  | gw   | 3     | jun-22  | 3.4  | 18.40 | 7.35 | 0.60  | 1.07           | 52  | 24   | 42   | 1.7 | 72    | 195              | 51              | 1.5             | <0.1            | 0.03 | 0.19 | 11               | 0.17 | 5.6  | 0.55  |
| 15  | gw   | 3     | sept-20 | 3.0  | 19.35 | 7.53 | 0.49  | 3.10           | 47  | 21   | 31   | 2.7 | 59    | 173              | 44              | 4.0             | <0.1            | 0.04 | 0.27 | 11               | 0.14 | 5.3  | 0.58  |
| 16  | gw   | 3     | oct-20  | 5.7  | 18.66 | 6.69 | 0.28  | 5.57           | 23  | 9    | 24   | 2.3 | 41    | 91               | 18              | 6.4             | <0.1            | 0.03 | 0.21 | 13               | 0.13 | 1.8  | 0.31  |
| 16  | gw   | 3     | jun-22  | 4.5  | 17.90 | 6.40 | 0.22  | 6.83           | 12  | 6    | 22   | 1.4 | 37    | 37               | 15              | 4.4             | <0.1            | 0.02 | 0.09 | 12               | 0.08 | 1.6  | 0.32  |
| 18  | gw   | 3     | oct-20  | 3.5  | 21.00 | 6.52 | 0.86  | 4.27           | 78  | 28   | 76   | 4.5 | 128   | 224              | 99              | 6.2             | <0.1            | 0.08 | 0.46 | 17               | 0.24 | 7.8  | 1.51  |
| 19  | gw   | 3     | oct-20  | 2.7  | 22.20 | 6.44 | 0.67  | 6.00           | 48  | 16   | 73   | 3.5 | 134   | 112              | 48              | 16              | <0.1            | 0.07 | 0.46 | 22               | 0.20 | 5.50 | 0.78  |
| 20  | gw   | 3     | oct-20  | 4.9  | 22.13 | 6.83 | 0.86  | 5.55           | 45  | 22   | 111  | 1.7 | 165   | 136              | 77              | 36              | <0.1            | 0.10 | 0.52 | 30               | 0.25 | 11   | 0.73  |
| 21  | gw   | 3     | oct-20  | 3.6  | 18.13 | 6.94 | 0.52  | 5.44           | 51  | 16   | 41   | 2.7 | 83    | 148              | 51              | 4.0             | <0.1            | 0.29 | 0.32 | 15               | 0.17 | 5.3  | 0.80  |
| 22  | gw   | 3     | oct-20  | 2.9  | 18.28 | 6.99 | 0.83  | 4.48           | 78  | 30   | 72   | 1.7 | 131   | 239              | 94              | 2.0             | <0.1            | 0.06 | 0.48 | 15               | 0.19 | 7.1  | 0.86  |
| 23  | gw   | 3     | oct-20  | 3.7  | 18.85 | 6.59 | 0.55  | 4.35           | 54  | 17   | 44   | 1.9 | 68    | 131              | 88              | 6.0             | <0.1            | 0.04 | 0.40 | 18               | 0.20 | 11   | <0.01 |
| 24  | gw   | 3     | oct-20  | 2.9  | 23.55 | 6.58 | 0.94  | 5.20           | 77  | 28   | 97   | 6.9 | 107   | 319              | 90              | 12.2            | <0.1            | 0.15 | 0.39 | 18               | 0.22 | 5.8  | <0.01 |
| 24  | gw   | 3     | jun-22  | 3.8  | 18.20 | 6.66 | 1.19  | 2.78           | 103 | 39   | 116  | 7.0 | 207   | 294              | 120             | 17.8            | <0.1            | 0.12 | 0.46 | 17               | 0.31 | 5.2  | 0.40  |
| 26d | gw   | 2     | jun-22  | -    | 19.10 | 7.20 | 3.47  | 2.72           | 212 | 111  | 409  | 7.5 | 1120  | 163              | 126             | <0.2            | 0.16            | 0.04 | 3.5  | 11               | 0.77 | 27   | 2.05  |
| 26s | gw   | 2     | oct-20  | 1.1  | 20.43 | 7.54 | 2.73  | —              | 175 | 93   | 232  | 6.6 | 833   | 154              | 74              | 2.9             | <0.1            | 0.05 | 3.8  | 11               | 0.69 | 26   | 1.75  |
| 26s | gw   | 2     | jun-22  | 1.5  | 18.50 | 7.10 | 3.22  | 3.64           | 203 | 106  | 347  | 7.6 | 1040  | 158              | 111             | 0.32            | <0.1            | 0.04 | 3.2  | 11               | 0.85 | 23   | 1.77  |
| 27  | gw   | 3     | oct-20  | 1.0  | 18.95 | 8.04 | 0.76  | 2.07           | 49  | 37   | 60   | 10  | 159   | 238              | 7               | 0.48            | 2.10            | 0.26 | 0.75 | 21               | 0.34 | 3.2  | 2.27  |
| 27  | gw   | 3     | jun-22  | 1.3  | 20    | 8.1  | 0.81  | 0.90           | 49  | 38   | 64   | 9.4 | 174   | 233              | 4               | <0.2            | 2.0             | 0.25 | 0.5  | 22               | 0.40 | 3    | 2.4   |
| 29  | gw   | 2     | oct-20  | 2.7  | 19.23 | 6.62 | 2.72  | 3.71           | 114 | 66   | 400  | 3.2 | 790   | 213              | 145             | 3.7             | <0.1            | 0.07 | 4.0  | 12               | 0.38 | 22   | 1.20  |
| 30  | gw   | 2     | oct-20  | 7.3  | 20.65 | 6.71 | 2.09  | 5.65           | 112 | 55   | 251  | 3.9 | 601   | 151              | 87              | 17              | <0.1            | 0.11 | 2.1  | 27               | 0.63 | 30   | <0.01 |
| 30  | gw   | 2     | jun-22  | 7.6  | 21.20 | 6.82 | 1.90  | 2.13           | 94  | 44   | 248  | 4.5 | 478   | 175              | 116             | 52              | 0.27            | 0.10 | 1.3  | 22               | 0.55 | 19   | 0.41  |
| 32  | gw   | 2     | oct-20  | 2.2  | 19.62 | 7.22 | 2.77  | 8.64           | 133 | 77   | 431  | 4.5 | 904   | 188              | 142             | 3.8             | <0.1            | 0.07 | 4.5  | 12               | 0.43 | 25   | 2.3   |
| 33  | gw   | 3     | oct-20  | 3.3  | 18.63 | 6.36 | 0.30  | 5.60           | 54  | 17   | 43   | 1.5 | 79    | 135              | 74              | 4.6             | <0.1            | 0.04 | 0.47 | 16               | 0.17 | 6.4  | 0.29  |
| 34  | gw   | 3     | oct-20  | 3.6  | 18.50 | 6.64 | 0.58  | 3.07           | 59  | 19   | 46   | 1.5 | 89    | 143              | 79              | 0.72            | <0.1            | 0.04 | 0.50 | 15               | 0.19 | 6.3  | <0.01 |
| 35  | gw   | 2     | oct-20  | 1.3  | 20.58 | 6.96 | 3.77  | 5.32           | 154 | 91   | 601  | 5.7 | 1199  | 178              | 178             | 1.0             | <0.1            | 0.07 | 4.4  | 11               | 0.47 | 25   | 2.5   |
| 36d | gw   | 1     | jun-22  | -    | 18.80 | 8.08 | 26.00 | 1.82           | 675 | 1086 | 7630 | 103 | 15180 | 213              | 1670            | <0.2            | 6.90            | 0.49 | 47   | 4.6              | 5.4  | 78   | 17    |
| 36s | gw   | 2     | oct-20  | 1.6  | 20.67 | 7.54 | 3.24  | 6.16           | 168 | 88   | 353  | 6.5 | 951   | 156              | 114             | 2.00            | <0.1            | 0.05 | 4.6  | 11               | 0.71 | 20   | 2.2   |
| 36s | gw   | 2     | jun-22  | 1.7  | 19.60 | 6.90 | 3.77  | 0.72           | 172 | 106  | 514  | 10  | 1220  | 156              | 153             | <0.2            | 0.36            | 0.05 | 3.8  | 11               | 0.88 | 19   | 2.19  |
| 37  | gw   | 3     | oct-20  | 17   | 19.19 | 6.60 | 1.01  | 5.07           | 74  | 35   | 110  | 1.8 | 182   | 270              | 94              | 0.64            | <0.1            | 0.05 | 0.81 | 37               | 0.28 | 70   | 2.6   |
| 38  | gw   | 3     | oct-20  | 2.1  | 18.25 | 6.74 | 0.60  | 4.94           | 58  | 20   | 47   | 10  | 64    | 209              | 61              | 10              | <0.1            | 0.09 | 0.32 | 16               | 0.20 | 3.3  | 0.35  |
| 39  | gw   | 3     | oct-20  | 4.   | 18.80 | 6.84 | 1.12  | 3.42           | 102 | 45   | 99   | 2.7 | 177   | 346              | 107             | 6.4             | <0.1            | 0.13 | 0.69 | 16               | 0.35 | 21   | 1.5   |
| 40  | gw   | 3     | oct-20  | 3.4  | 18.84 | 7.10 | 0.59  | 4.12           | 62  | 26   | 37   | 1.4 | 64    | 224              | 60              | 0.78            | <0.1            | 0.04 | 0.44 | 10               | 0.17 | 3.87 | 0.31  |
| 40  | gw   | 3     | jun-22  |      | 18.20 | 7.21 | 0.55  | 2.69           | 55  | 24   | 35   | 1.5 | 54    | 215              | 52              | 0.72            | <0.1            | 0.04 | 0.17 | 10               | 0.16 | 3.63 | 0.41  |
| 42  | gw   | 2     | oct-20  | -    | 20.10 | 7.17 | 2.74  | 7.77           | 111 | 66   | 397  | 3.3 | 790   | 227              | 153             | 3.5             | <0.1            | 0.07 | 3.6  | 13               | 0.39 | 20   | 1.6   |
| 43  | gw   | 2     | oct-20  | 2.9  | 18.48 | 6.71 | 1.85  | 3.00           | 73  | 50   | 273  | 3.4 | 505   | 184              | 108             | 3.8             | <0.1            | 0.06 | 2.1  | 11               | 0.25 | 11   | 1.3   |
| 44  | gw   | 3     | oct-20  | 3.0  | 18.41 | 6.74 | 0.54  | 4.79           | 57  | 17   | 41   | 1.9 | 64    | 142              | 84              | 4.9             | <0.1            | 0.04 | 0.42 | 17               | 0.19 | 6.58 | 0.53  |
| 44  | gw   | 3     | oct-20  | 3.0  | 18.97 | 6.66 | 0.54  | 3.63           | 58  | 17   | 41   | 1.8 | 65    | 147              | 85              | 4.5             | <0.1            | 0.04 | 0.40 | 17               | 0.19 | 6.65 | 0.47  |
| 44  | gw   | 3     | jun-22  | 4.2  | 18.60 | 6.80 | 0.54  | 3.89           | 52  | 16   | 41   | 2.0 | 66    | 135              | 76              | 8.4             | <0.1            | 0.04 | 0.18 | 17               | 0.20 | 5.72 | 0.46  |
| 47  | gw   | 3     | oct-20  | 4.2  | 18.32 | 7.15 | 0.59  | 6.51           | 57  | 19   | 48   | 1.7 | 85    | 143              | 88              | 5.0             | <0.1            | 0.05 | 0.52 | 17               | 0.19 | 9.15 | <0.01 |
| 48  | gw   | 3     | oct-20  | 5.0  | 17.14 | 7.29 | 0.52  | 4.17           | 63  | 21   | 29   | 2.2 | 55    | 215              | 54              | 1.6             | <0.1            | 0.03 | 0.35 | 8.3              | 0.16 | 4.40 | 0.30  |
| 49  | gw   | 2     | oct-20  | -    | 20.61 | 6.60 | 2.37  | 1.60           | 121 | 70   | 298  | 3.0 | 695   | 199              | 109             | 1.8             | <0.1            | 0.70 | 2.9  | 25               | 0.70 | 65   | 3.6   |
| 50  | gw   | 3     | oct-20  | 5.7  | 19.76 | 7.04 | 0.53  | 4.96           | 66  | 21   | 30   | 1.8 | 55    | 222              | 54              | 0.50            | <0.1            | 0.03 | 0.35 | 10               | 0.17 | 5.28 | 0.68  |
| 51  | gw   | 3     | oct-20  | 5.4  | 17.95 | 6.76 | 0.46  | 5.92           | 46  | 18   | 32   | 3.8 | 57    | 164              | 47</            |                 |                 |      |      |                  |      |      |       |

| ID  | Type | Group  | Data   | DWT<br>m | T<br>(°C) | pH   | EC<br>mS/cm | O <sub>2</sub> | Ca  | Mg   | Na    | K   | Cl-   | HCO <sub>3</sub> | SO <sub>4</sub> | NO <sub>3</sub> | NH <sub>4</sub> | B    | Br   | SiO <sub>2</sub> | Sr   | Li<br>µg/L | Rb<br>µg/L |
|-----|------|--------|--------|----------|-----------|------|-------------|----------------|-----|------|-------|-----|-------|------------------|-----------------|-----------------|-----------------|------|------|------------------|------|------------|------------|
| 57  | sw   | 1      | oct-20 | -        | 22.86     | 8.10 | 23.56       | 13.00          | 176 | 548  | 4580  | 151 | 8700  | 175              | 1138            | 5.0             | <0.1            | 2.3  | 30   | 3.9              | 1.3  | 105        | 57         |
| 58  | sw   | 1      | oct-20 | -        | 21.53     | 7.40 | 46.02       | 6.00           | 319 | 1170 | 10250 | 281 | 19360 | 172              | 2150            | 1.0             | <0.1            | 4.7  | 78   | 3.3              | 2.7  | 232        | 111        |
| 59  | sw   | 1      | oct-20 | -        | 22.20     | 8.00 | 39.68       | 10.36          | 296 | 1010 | 8300  | 226 | 16100 | 205              | 463             | 1.0             | <0.1            | 3.9  | 53   | 4.4              | 2.2  | 184        | 91         |
| 60  | sw   | 3      | oct-20 | -        | 20.50     | 7.13 | 0.50        | 6.39           | 54  | 18   | 31    | 2.7 | 55    | 188              | 48              | 0.76            | <0.1            | 0.04 | 0.26 | 9.6              | 0.16 | 5.2        | 0.57       |
| 61  | sw   | 2      | oct-20 | -        | 23.00     | 7.59 | 5.45        | 5.85           | 85  | 93   | 998   | 29  | 1784  | 204              | 261             | <1              | <0.1            | 0.46 | 6.30 | 2.9              | 0.31 | 25         | 11         |
| SW* | sw   | Lagoon | oct-20 | -        | 23.50     | 7.88 | 54.55       | 7.68           | 415 | 1240 | 12400 | 483 | 23180 | 163              | 2640            | 1.00            | <0.1            | 5.5  | 91   | <1.4             | 3.1  | 276        | 136        |
